# Supplementary material for: Seasonal dynamics and annual budget of dissolved inorganic carbon in the northwestern Mediterranean deep-convection region
Source: Copernicus journal article supplement (doi:10.5194/bg-20-4683-2023), 2023-11-28
Supplement: Supplementary file 1 [file bg-20-4683-2023-supplement.zip]

Supplementary Material

5 Table S1: Sensitivity tests to the parameterization of gas transfer velocity, the variability of the mole fraction of CO<sub>2</sub> in the atmosphere, and the calcification processes on the annual CO<sub>2</sub> air-sea flux estimate.

| Sensitivity tests                                                                          |                                                           | Annual air-sea flux (mol C m <sup>-2</sup> yr <sup>-1</sup> ) |
|--------------------------------------------------------------------------------------------|-----------------------------------------------------------|---------------------------------------------------------------|
| Sensitivity to the parameterizations of gas transfer velocity, type of the parametrization | Parameterizations of gas transfer velocity                |                                                               |
| Quadratic wind dependency                                                                  | Wanninkhof (1992) used in the standard run                | 0.47                                                          |
|                                                                                            | Wanninkhof (2014)                                         | 0.37                                                          |
| Hybrid wind dependency                                                                     | Liss and Merlivat (1986)                                  | 0.25                                                          |
|                                                                                            | Nightingale et al. (2000)                                 | 0.35                                                          |
|                                                                                            | Wanninkhof et al. (2009)                                  | 0.34                                                          |
| Cubic wind dependency                                                                      | Wanninkhof and McGillis (1999)                            | 0.60                                                          |
| Including explicit bubbles parametrizations                                                | Woolf (1997)                                              | 0.55                                                          |
|                                                                                            | Stanley et al. (2009)                                     | 0.55                                                          |
|                                                                                            | Liang et al. (2013)                                       | 0.42                                                          |
|                                                                                            | Mean (SD)                                                 | 0.43 (0.12)                                                   |
| Sensitivity to the mole fraction of CO <sub>2</sub> in the atmosphere                      | Added value to the mole fraction used in the standard run |                                                               |
|                                                                                            | -3 ppm                                                    | 0.33                                                          |
|                                                                                            | +3 ppm                                                    | 0.61                                                          |
|                                                                                            | Mean (SD)                                                 | 0.47 (0.20)                                                   |
| Sensitivity to CaCO <sub>3</sub> production                                                | Added term to Eq. 1                                       |                                                               |
|                                                                                            | Based on mean [minimum - maximum] PIC:POC ratio and NCP   | 0.29 [0.36,- 0.20]                                            |
|                                                                                            | Based on Lajaunie-Salla et al. (2021)                     | 0.40                                                          |
|                                                                                            | Mean (SD)                                                 | 0.35 (0.08)                                                   |

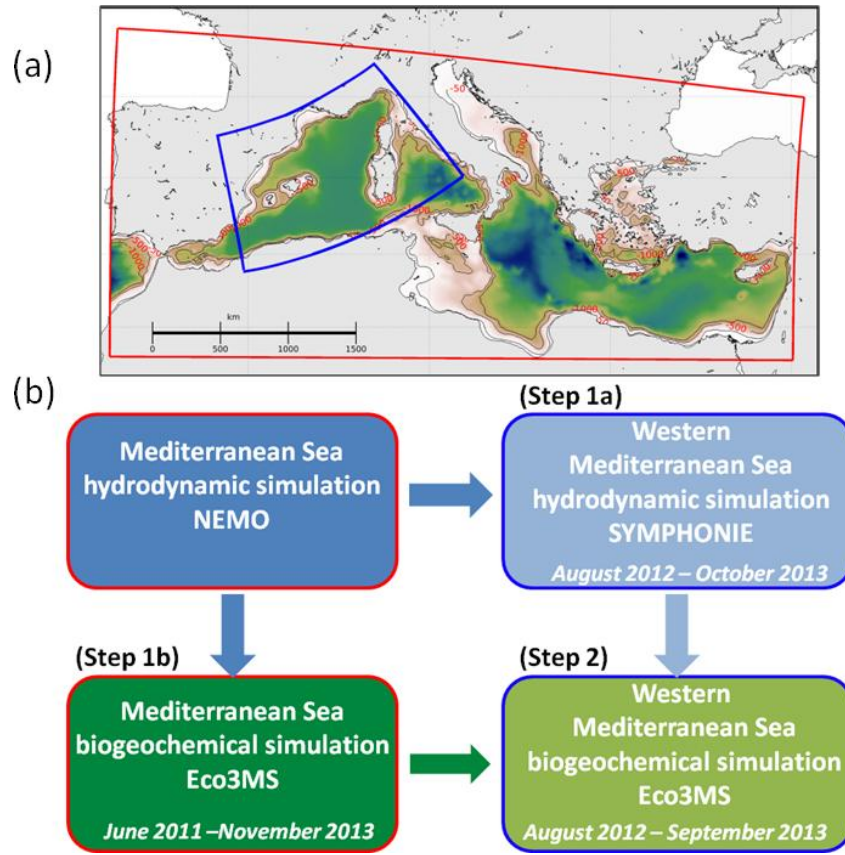

**Figure S1:** Domain and bathymetry (m) of (a) the forcing coupled NEMO-Eco3MS Mediterranean model (red contour) and of the coupled SYMPHONIE-Eco3MS western sub-basin model (blue contour). (b) Scheme of the downscaling strategy from the Mediterranean Sea to the western sub-basin.

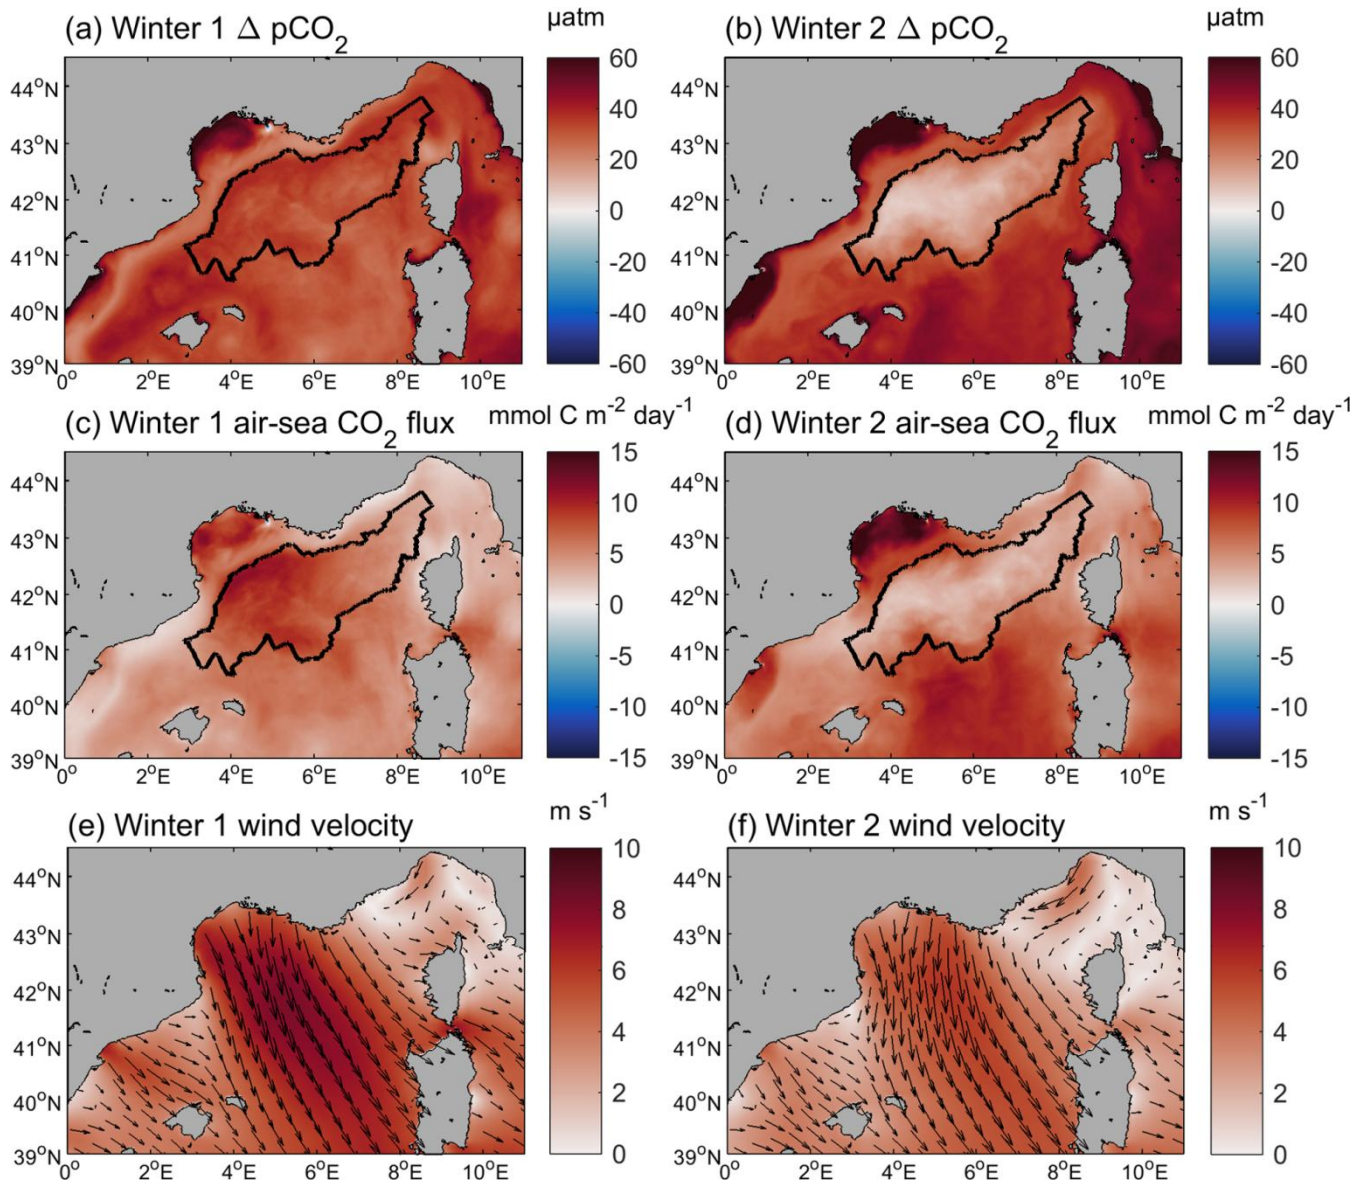

**Figure S2:** (a,b)  $p\text{CO}_2$  difference ( $p\text{CO}_{2,\text{atm}} - p\text{CO}_{2,\text{sea}}$ , in  $\mu\text{atm}$ ), (c,d) air-to-sea  $\text{CO}_2$  flux ( $\text{mmol C m}^{-2} \text{ day}^{-1}$ ) and (e,f) wind velocity ( $\text{m s}^{-1}$ ), averaged over winter 1 (28 November-15 January) and winter 2 (16 January-23 March) sub-periods. The black line indicates the limit of the deep convection area.
