# Supplementary material for: Seasonal dynamics and annual budget of dissolved inorganic carbon in the northwestern Mediterranean deep-convection region
Source: Copernicus journal article supplement (doi:10.5194/bg-20-4683-2023), 2023-11-28
Supplement: Supplementary file 2 [file bg-20-4683-2023-supplement.zip]

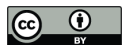

*Supplement of*

**Seasonal dynamics and annual budget of dissolved inorganic carbon in the northwestern Mediterranean deep-convection region**

**Caroline Ulses et al.**

*Correspondence to:* Caroline Ulses (caroline.ulses@univ-tlse3.fr)

- bg-20-4683-2023-supplement-title-page.pdf
- Supplement
  - FigureS1.png
  - FigureS2.png
  - Ulses\_ea\_DIC\_DeepConvection\_SuppMat\_Final.pdf

The copyright of individual parts of the supplement might differ from the article licence.
